# Supplementary material for: A metabolic modeling approach reveals promising therapeutic targets and antiviral drugs to combat COVID-19
Source: PubMed Central journal article supplement (PMC8184994; doi:10.1038/s41598-021-91526-3), 2021-06-07

## Supplementary figures for:

### **A metabolic modeling approach reveals promising therapeutic targets and antiviral drugs to combat COVID-19**

Fernando Santos-Beneit<sup>1</sup>, Vytautas Raškevičius<sup>2</sup>, Vytenis A. Skeberdis<sup>2</sup>, Sergio Bordel<sup>1,2</sup>.

1. Institute of Sustainable Processes, Universidad de Valladolid, Spain.
2. Cell Culture Laboratory, Institute of Cardiology, Lithuanian University of Health Sciences, Kaunas, Lithuania

\* Sergio Bordel. **Email:** sergio.bordel@uva.es

## List of proposed drugs

### Celgosivir

PubChem CID: 60734  
Molecular Formula: C<sub>12</sub>H<sub>21</sub>NO<sub>5</sub>

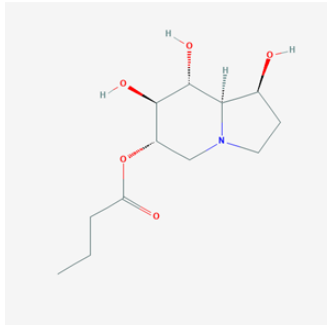

### Tunicamycin

PubChem CID: 57654701  
Molecular Formula: C<sub>37</sub>H<sub>60</sub>N<sub>4</sub>O<sub>16</sub>

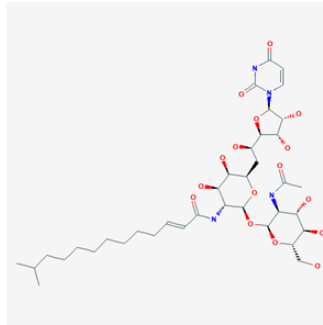

### Propylthiouracil

PubChem CID: 657298  
Molecular Formula: C<sub>7</sub>H<sub>10</sub>N<sub>2</sub>O<sub>2</sub>S

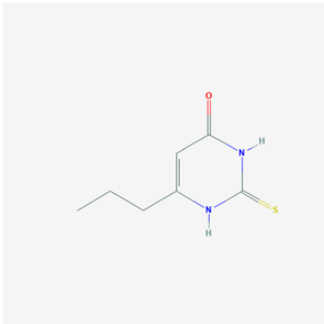

### Dehydro-ZINC39395747

PubChem CID: 702583  
Molecular Formula: C<sub>12</sub>H<sub>9</sub>N<sub>3</sub>O<sub>2</sub>S<sub>2</sub>

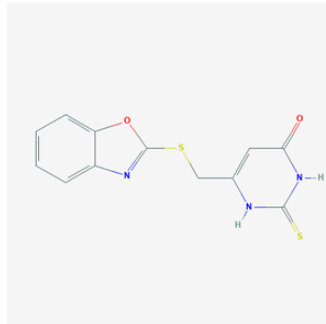

### 2-Bromohexadecanoic acid

PubChem CID: 82145  
Molecular Formula: C<sub>16</sub>H<sub>31</sub>BrO<sub>2</sub>

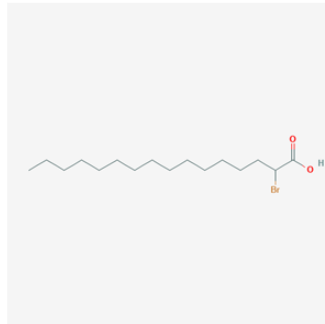

### Lipofermata

PubChem CID: 3136622  
Molecular Formula: C<sub>15</sub>H<sub>10</sub>BrN<sub>3</sub>O<sub>3</sub>S

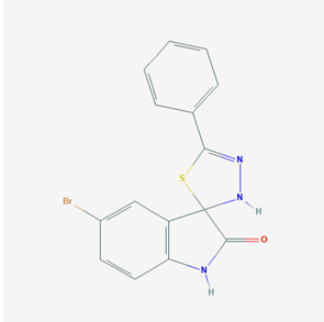

### Triascin c

PubChem CID: 9576787  
Molecular Formula: C<sub>11</sub>H<sub>17</sub>N<sub>3</sub>O

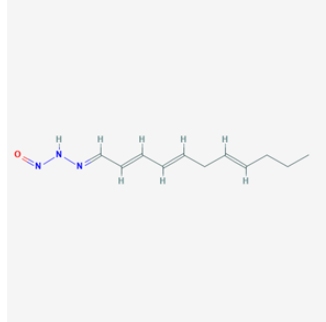

### Benzyl isothiocyanate

PubChem CID: 2346  
Molecular Formula: C<sub>8</sub>H<sub>7</sub>NS

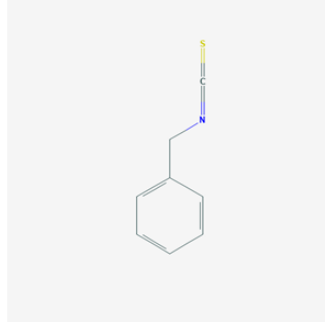

### Tipifarnib

PubChem CID: 159324  
Molecular Formula: C<sub>27</sub>H<sub>22</sub>Cl<sub>2</sub>N<sub>4</sub>O

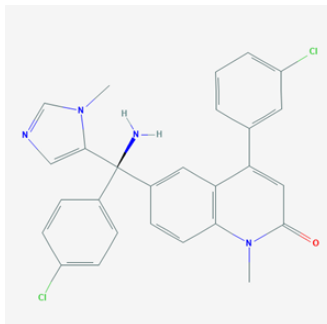

### Lonafarnib

PubChem CID: 148195  
Molecular Formula: C<sub>27</sub>H<sub>31</sub>Br<sub>2</sub>ClN<sub>4</sub>O<sub>2</sub>

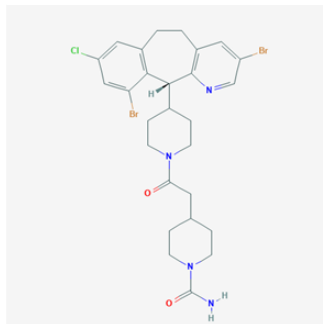

Supplement: 41598_2021_91526_MOESM2_ESM.pdf [file 41598_2021_91526_MOESM2_ESM.pdf]
