# Supplementary material for: A metabolic modeling approach reveals promising therapeutic targets and antiviral drugs to combat COVID-19
Source: PubMed Central journal article supplement (PMC8184994; doi:10.1038/s41598-021-91526-3), 2021-06-07
Supplement: 41598_2021_91526_MOESM3_ESM.pdf [file 41598_2021_91526_MOESM3_ESM.pdf]

## Supplementary material

### **A metabolic modeling approach reveals promising therapeutic targets and antiviral drugs to combat COVID-19**

Fernando Santos-Beneit<sup>1</sup>, Vytautas Raškevičius<sup>2</sup>, Vytenis A. Skeberdis<sup>2</sup>, Sergio Bordel<sup>1,2</sup>.

1. Institute of Sustainable Processes, Universidad de Valladolid, Spain.
2. Institute of Cardiology, Lithuanian University of Health Sciences, Kaunas, Lithuania

\* Sergio Bordel. **Email:** sergio.bordel@uva.es

Fernando Santos-Beneit: <https://orcid.org/0000-0001-7986-5557>

Sergio Bordel: <https://orcid.org/0000-0001-6162-6478>

**Table S1.** Composition of the viral particles used in the model of SARS-CoV-2 infected cells.

| Virion components        | Number of molecules per virion |
|--------------------------|--------------------------------|
| Viral RNA                | 1                              |
| S protein                | 270                            |
| M protein                | 1440                           |
| N protein                | 758                            |
| Cholesterol              | 1600                           |
| Phosphatidylcholine      | 10800                          |
| Phosphatidylethanolamine | 4000                           |
| Phosphatidylinositol     | 2100                           |

**Docking results:**

In order to quantify the interaction between each target enzyme and its putative inhibitors, the  $\Delta G$  of binding was calculated after docking. The results are shown in the following table.

**Table S2.** Target-inhibitor binding affinities predicted by docking.

| Gene    | Uniprot ID | Inhibitor              | CID     | affinity (kcal/mo) |
|---------|------------|------------------------|---------|--------------------|
| FAR2    | Q96K12     | Lonafarnib             | 148195  | -10.9              |
| FAR2    | Q96K12     | Tipifarnib             | 159324  | -9.5               |
| ALG8    | Q9BVK9     | Castanospermine        | 54445   | -5.5               |
| CYB5R3  | P00387     | Propylthiouracil (PTU) | 657298  | -5.4               |
| CYB5R3  | P00387     | ZINC39395747           | -       | -7.5               |
| CYB5R3  | P00387     | ZINC05626394           | -       | -6.5               |
| ACSL3   | O95573     | Triacsin C             | 9576787 | -6.1               |
| SLC27A2 | O14975     | Diclofenac             | 3033    | -7.2               |
| ZDHHC5  | Q9C0B5     | 2-bromopalmitate       | 82145   | -4.6               |

The most negative values of  $\Delta G$  correspond to the inhibitors of FAR2, Lonafarnib and Tipifarnib, which bind in the same region as NADPH with equal or higher affinity (see the main figure).

Propylthyouracil is a drug already approved against hyperthyroidism, thus it can be particularly interesting for further research. However, the experimental compounds ZINC39395747 and ZINC05626394 have a stronger binding to their substrate CYB5R3. Figure 1 shows the docking results for these three compounds.

**List of proposed drugs:**

**Celgosivir**

PubChem CID: 60734  
Molecular Formula: C<sub>12</sub>H<sub>21</sub>NO<sub>5</sub>

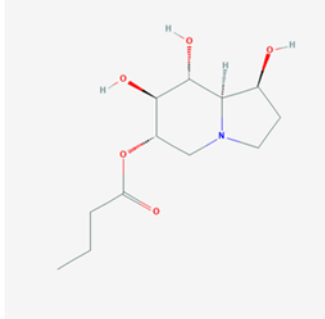

**Tunicamycin**

PubChem CID: 57654701  
Molecular Formula: C<sub>37</sub>H<sub>60</sub>N<sub>4</sub>O<sub>16</sub>

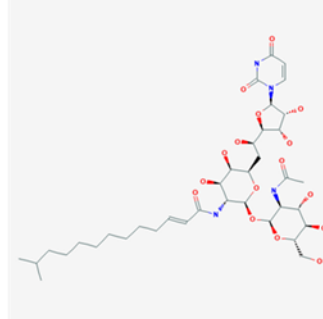

**Propylthiouracil**

PubChem CID: 657298  
Molecular Formula: C<sub>7</sub>H<sub>10</sub>N<sub>2</sub>O<sub>2</sub>S

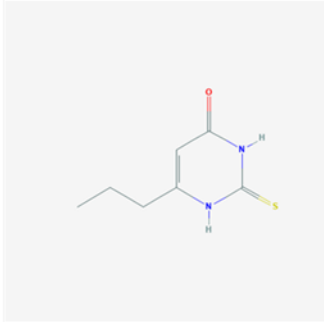

**Dehydro-ZINC39395747**

PubChem CID: 702583  
Molecular Formula: C<sub>12</sub>H<sub>9</sub>N<sub>3</sub>O<sub>2</sub>S<sub>2</sub>

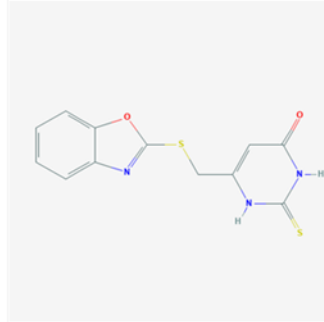

**2-Bromohexadecanoic acid**

PubChem CID: 82145  
Molecular Formula: C<sub>16</sub>H<sub>31</sub>BrO<sub>2</sub>

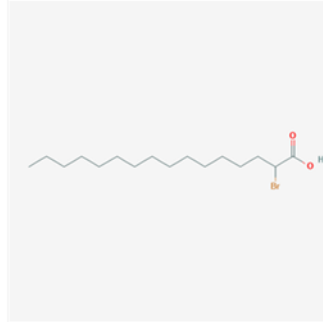

**Lipofermata**

PubChem CID: 3136622  
Molecular Formula: C<sub>15</sub>H<sub>10</sub>BrN<sub>3</sub>O<sub>2</sub>S

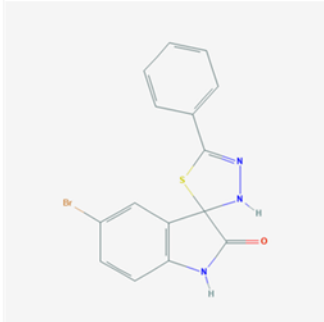

**Triascin c**

PubChem CID: 9576787  
Molecular Formula: C<sub>11</sub>H<sub>17</sub>N<sub>3</sub>O

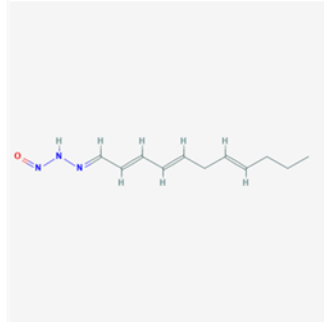

**Benzyl isothiocyanate**

PubChem CID: 2346  
Molecular Formula: C<sub>8</sub>H<sub>7</sub>NS

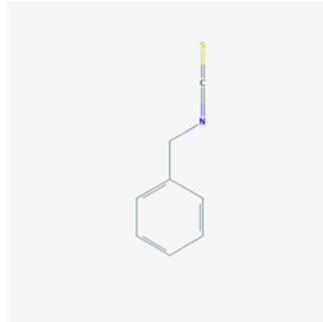

**Tipifarnib**

PubChem CID: 159324  
Molecular Formula: C<sub>27</sub>H<sub>22</sub>Cl<sub>2</sub>N<sub>4</sub>O

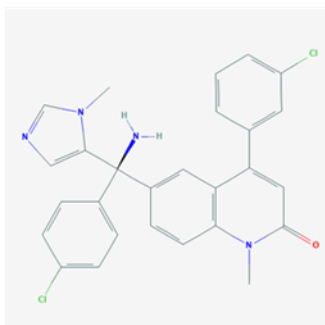

**Lonafarnib**

PubChem CID: 148195  
Molecular Formula: C<sub>27</sub>H<sub>31</sub>Br<sub>2</sub>ClN<sub>4</sub>O<sub>2</sub>

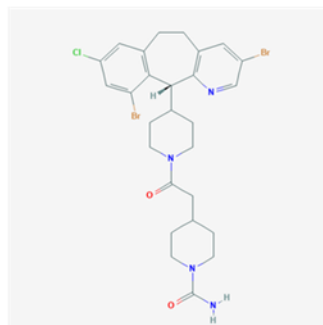

**Figure S1.** Structures and indentifiers of each of the putative inhibitors identified.
